# Supplementary material
Source: Springer Nature journal article supplement (https://www.springermedizin.de/resource/supplementary/13075_2011_3461_MOESM4_ESM.pdf/9694570)

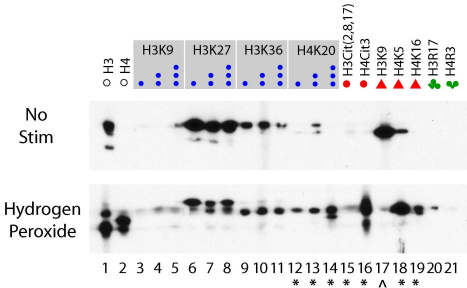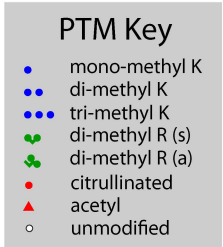

Supplement: MOESM4 [file 9694570]
